# Supplementary material
Source: publisher figshare collection journal article supplement (https://acs.figshare.com/ndownloader/files/28374780)
Supplement: Supplementary file 1 [file 28374780]

# Supporting information

## **Inkjet Printing of Benzocyclobutene-based Polymer as a Low-k Material for Electronic Applications**

*Filippo Iervolino,<sup>†,\*</sup> Raffaella Suriano,<sup>†</sup> Martina Scolari,<sup>‡</sup> Ilaria Gelmi,<sup>‡</sup> Laura Castoldi<sup>‡</sup> and Marinella Levi<sup>†</sup>*

<sup>†</sup> Department of Chemistry, Materials and Chemical Engineering "Giulio Natta", Politecnico di Milano, Piazza Leonardo da Vinci 32, 20133 Milan, Italy

<sup>‡</sup> STMicroelectronics, Via Camillo Olivetti, 2, 20864, Agrate Brianza (MB), Italy

\*Corresponding author: [filippo.iervolino@polimi.it](mailto:filippo.iervolino@polimi.it)

## **Contents**

**Figure S1.** Thermogravimetric analysis performed on the Cyclotene commercial resin.

**Figure S2.** Rheological analysis performed on the Cyclotene commercial resin, the BCB/MES-DPGDME ink and the BCB/MES ink.

**Figure S3.** Graphical representation of the applied waveform to obtain ejection at three different speeds: 3, 5, and 7 m/s.

**Figure S4.** Microscopic images of a detail of the bonding pattern printed with one, two, four, and six layers.

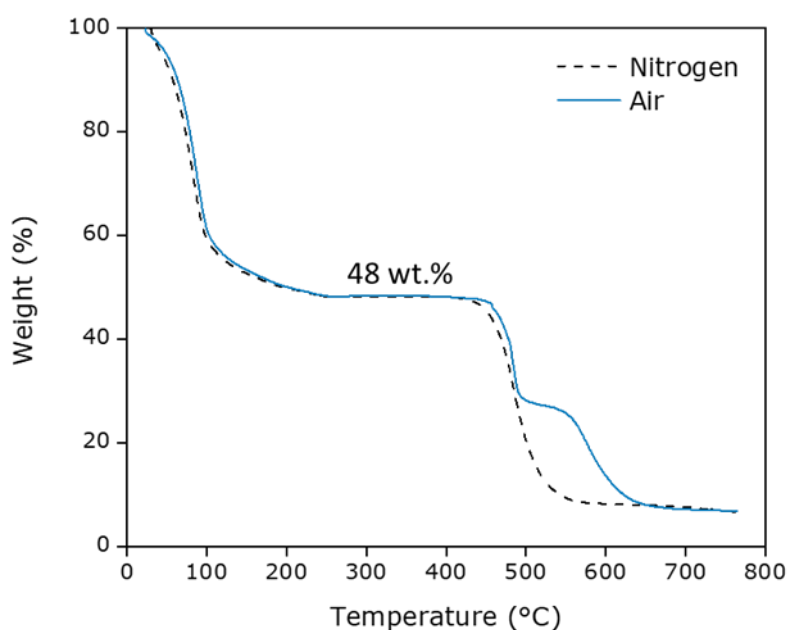

**Figure S1.** Thermogravimetric analysis performed on Cyclotene commercial resin in Nitrogen and air atmosphere. By examining the weight loss, it was possible to determine the mass concentration of polymer in the solution, corresponding to 48%, i.e., the plateau going from 200°C to 500°C.

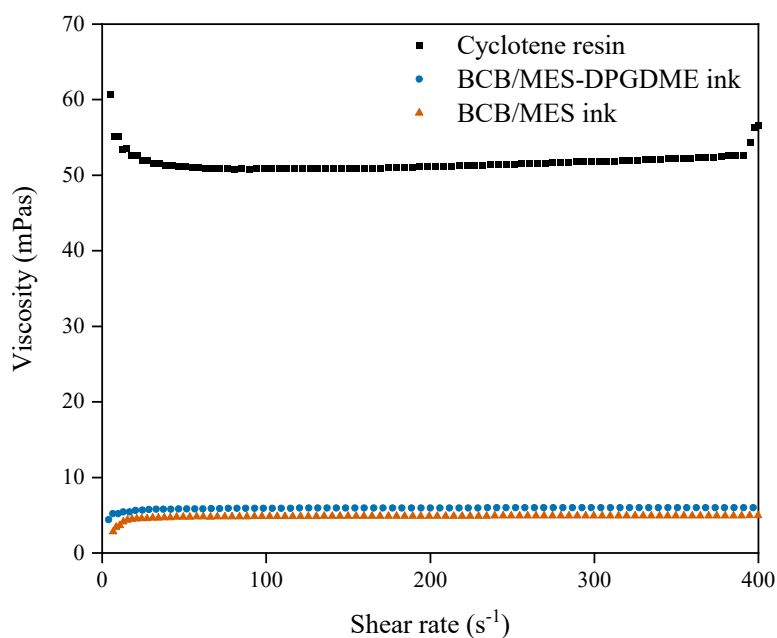

**Figure S2.** Rheological analysis on Cyclotene commercial resin, BCB/MES-DPGDME and BCB/MES inks. It is possible to observe that increasing the dilution of the commercial resin helped reducing the viscosity by one order of magnitude. In addition, the Newtonian behavior of the ink in the measurement range is shown.

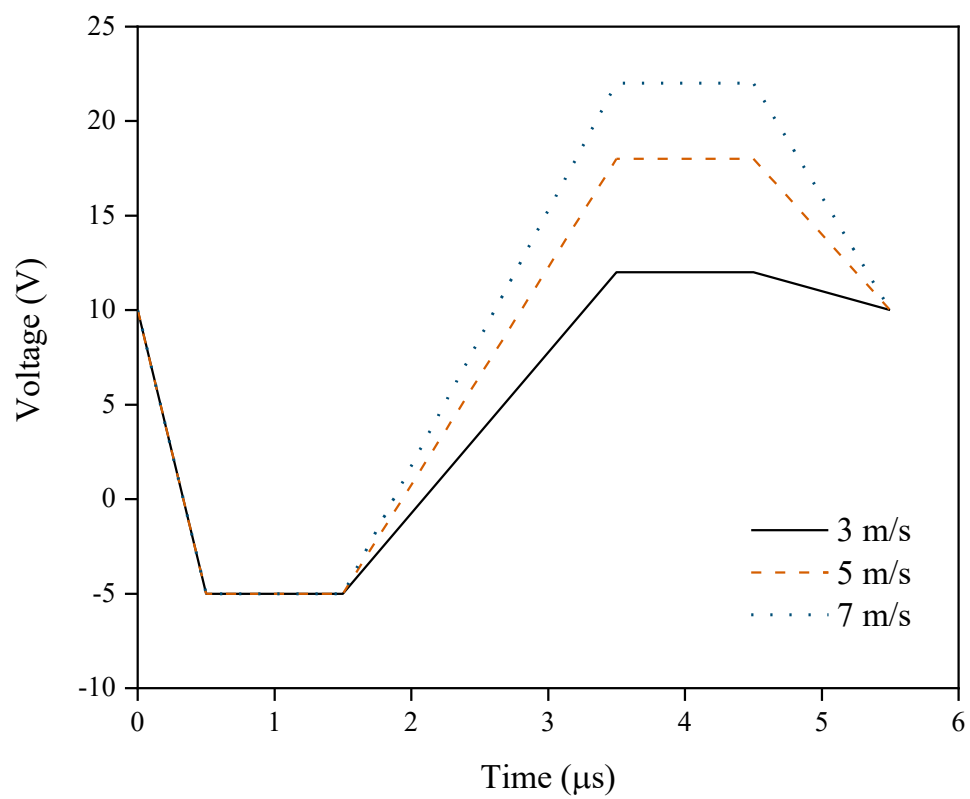

**Figure S3.** Waveforms applied to the ink to obtain three different ejection speed: 3, 5, and 7 m/s.

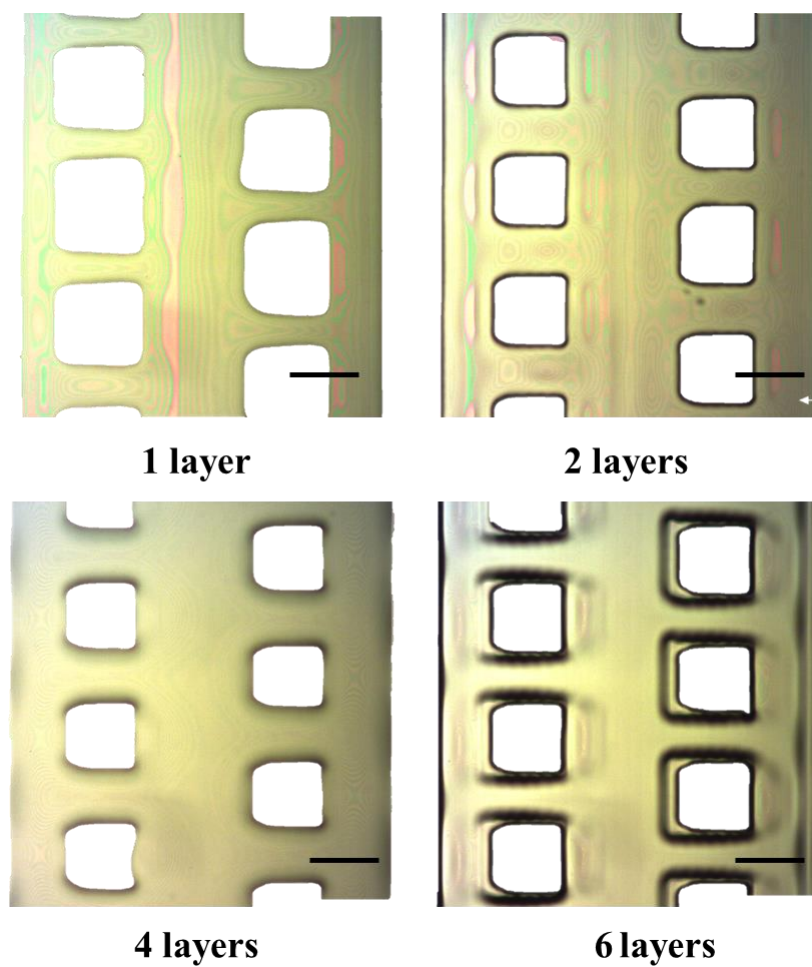

**Figure S4.** Images taken at the microscope of the bonding pattern printed with one, two, four and six layers. It is possible to observe that increasing the number of layers had a beneficial effect on the print quality up to the four-layer print. The six-layer pattern started to show some defects due to an excessive amount of material. Scale bars measure 200  $\mu\text{m}$ .
